# Supplementary material for: Improving reproducibility through condition-based sensitivity assessments: application, advancement and prospect
Source: Chem Sci. 2024 Aug 30;15(36):14548–55. doi: 10.1039/d4sc03017f (PMC11382186; doi:10.1039/d4sc03017f)
Supplement: SC-015-D4SC03017F-s001 [file SC-015-D4SC03017F-s001.xlsx]

## Sheet: diagram
																		Final diagram, please manually format axis titles
									Not the final diagram, just to compare axis titles
					Parameter	Target Value 1	Target Value 2
					Parameter name	Deviation in %	Deviation in %
					High c	0	0
					Low c	0	0
					H₂O	0	0
					Low O₂	0	0
					High O₂	0	0
					Low T	0	0
					High T	0	0
					Low p	0	0
					High p	0	0
					Big Scale	0	0
		Instructions:	1) Type in your chosen parameters (yellow box)
			2) If you do not want to have two target values in your sensitivity screen, right click on the diagrams → click on 'select data' → remove check mark for 'Series 15'
			3) Type in the respective deviations from your control reaction (yellow box, general number format, for 5% deviation just type 5)
			4) Two diagrams will be generated automatically, one with automatically updating axis titles (left) and the same diagram with text boxes as axis titles (right)
			5) Compare the axis titles and manually format the axis titles in the text boxes of the right diagram (subscript, italic etc.)
			6) Mark the diagram as well as all text boxes of the right diagram, copy, paste as Picture (Rightclick)
			7) Copy the picture to Word/Powerpoint/ChemDraw...

## Sheet: Tabelle1
				Dark Red Ring	Red Ring	Rose Ring	White Ring	Bright Green	Dark Green Ring
				-87.5	-62.5	-37.5	-12.5	12.5	37.5
				-87.5	-62.5	-37.5	-12.5	12.5	37.5
				-87.5	-62.5	-37.5	-12.5	12.5	37.5
				-87.5	-62.5	-37.5	-12.5	12.5	37.5
				-87.5	-62.5	-37.5	-12.5	12.5	37.5
				-87.5	-62.5	-37.5	-12.5	12.5	37.5
				-87.5	-62.5	-37.5	-12.5	12.5	37.5
				-87.5	-62.5	-37.5	-12.5	12.5	37.5
				-87.5	-62.5	-37.5	-12.5	12.5	37.5
				-87.5	-62.5	-37.5	-12.5	12.5	37.5
